# Supplementary material for: Impact of Liraglutide on Amylase, Lipase, and Acute Pancreatitis in Participants With Overweight/Obesity and Normoglycemia, Prediabetes, or Type 2 Diabetes: Secondary Analyses of Pooled Data From the SCALE Clinical Development Program
Source: Oxford University Press journal article supplement (doi:10.2337/dc16-2684), 2017-05-04
Supplement: dc162684supplementarydata.pdf [file dc162684supplementarydata.pdf]

SUPPLEMENTARY DATA

**Impact of Liraglutide on Amylase, Lipase and Acute Pancreatitis in Participants with Overweight/Obesity and Normoglycemia, Prediabetes or Type 2 Diabetes: Pooled Analyses of the SCALE Clinical Development Program**

William M Steinberg, MD, Julio Rosenstock, MD, Thomas A Wadden, PhD, Morten Donsmark, PhD, Christine B Jensen, MD, PhD, J Hans DeVries, MD, PhD

**Supplementary Figure 1.** Overview of the SCALE phase 3a clinical trial program.

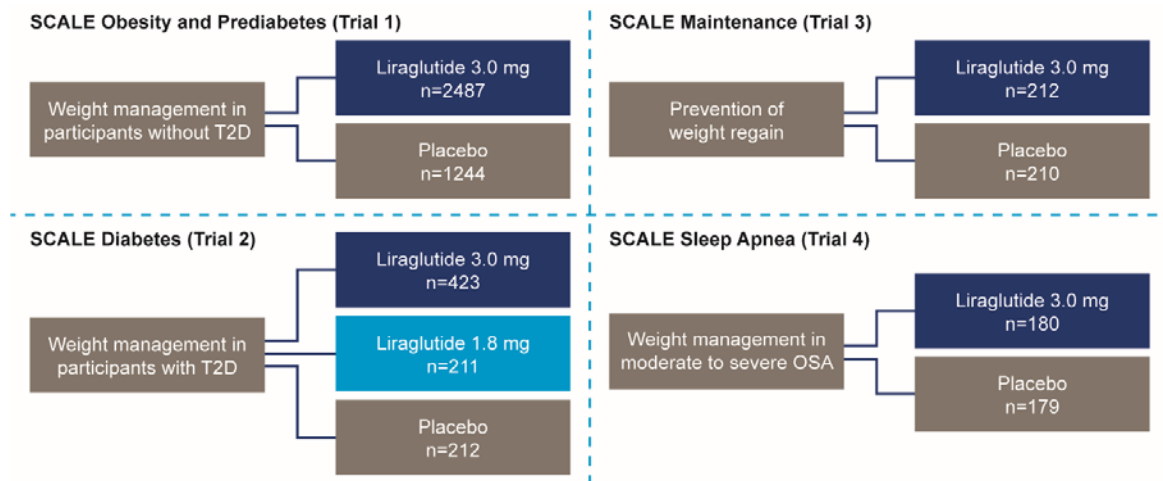

SUPPLEMENTARY DATA

**Supplementary Figure 2.** Incremental changes in amylase and lipase activity from baseline to end of treatment (pooled data from Trials 1-4).

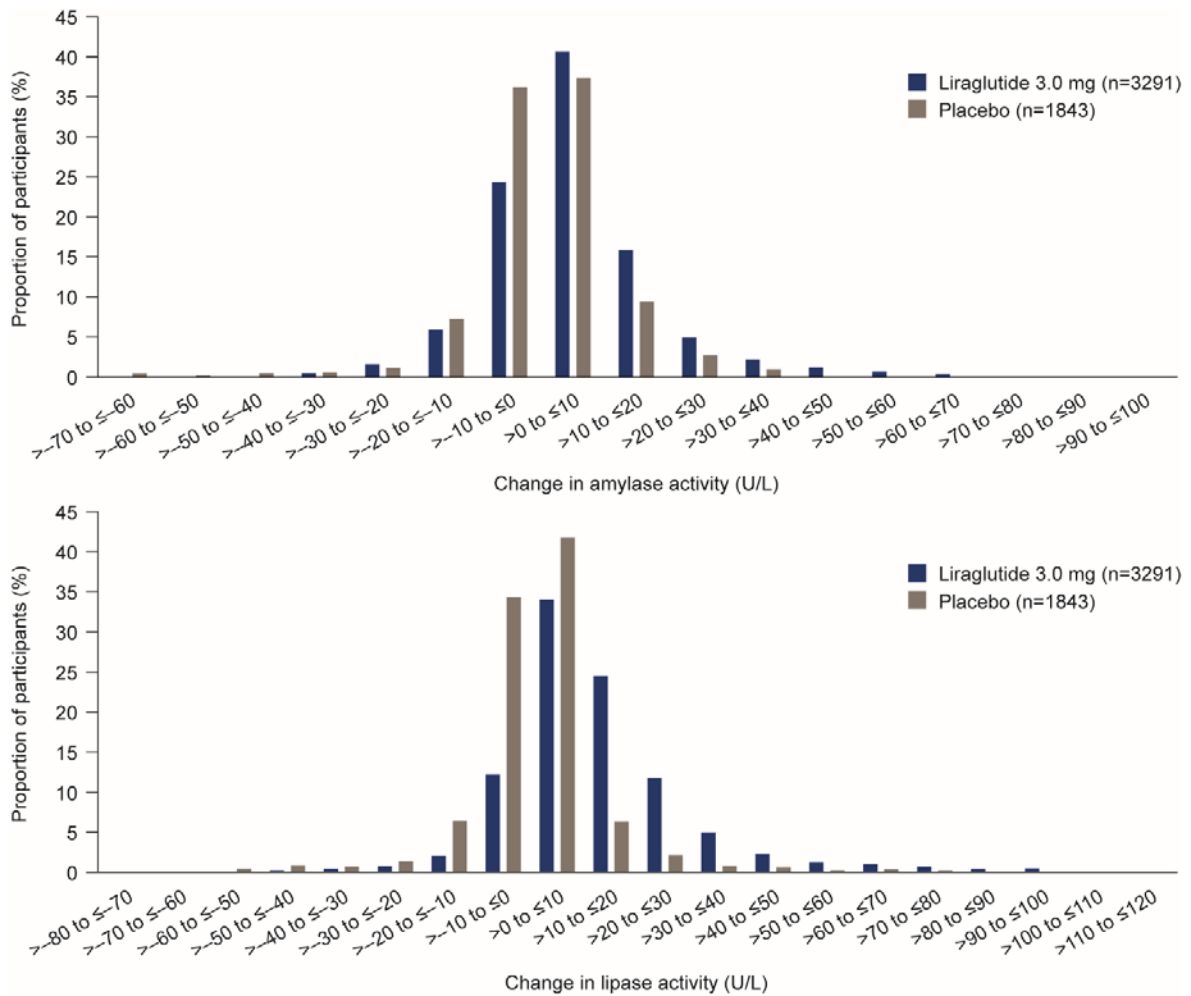

SUPPLEMENTARY DATA

**Supplementary Figure 3.** Recurrent elevations of (a) amylase and (b) lipase (at two or more consecutive visits).

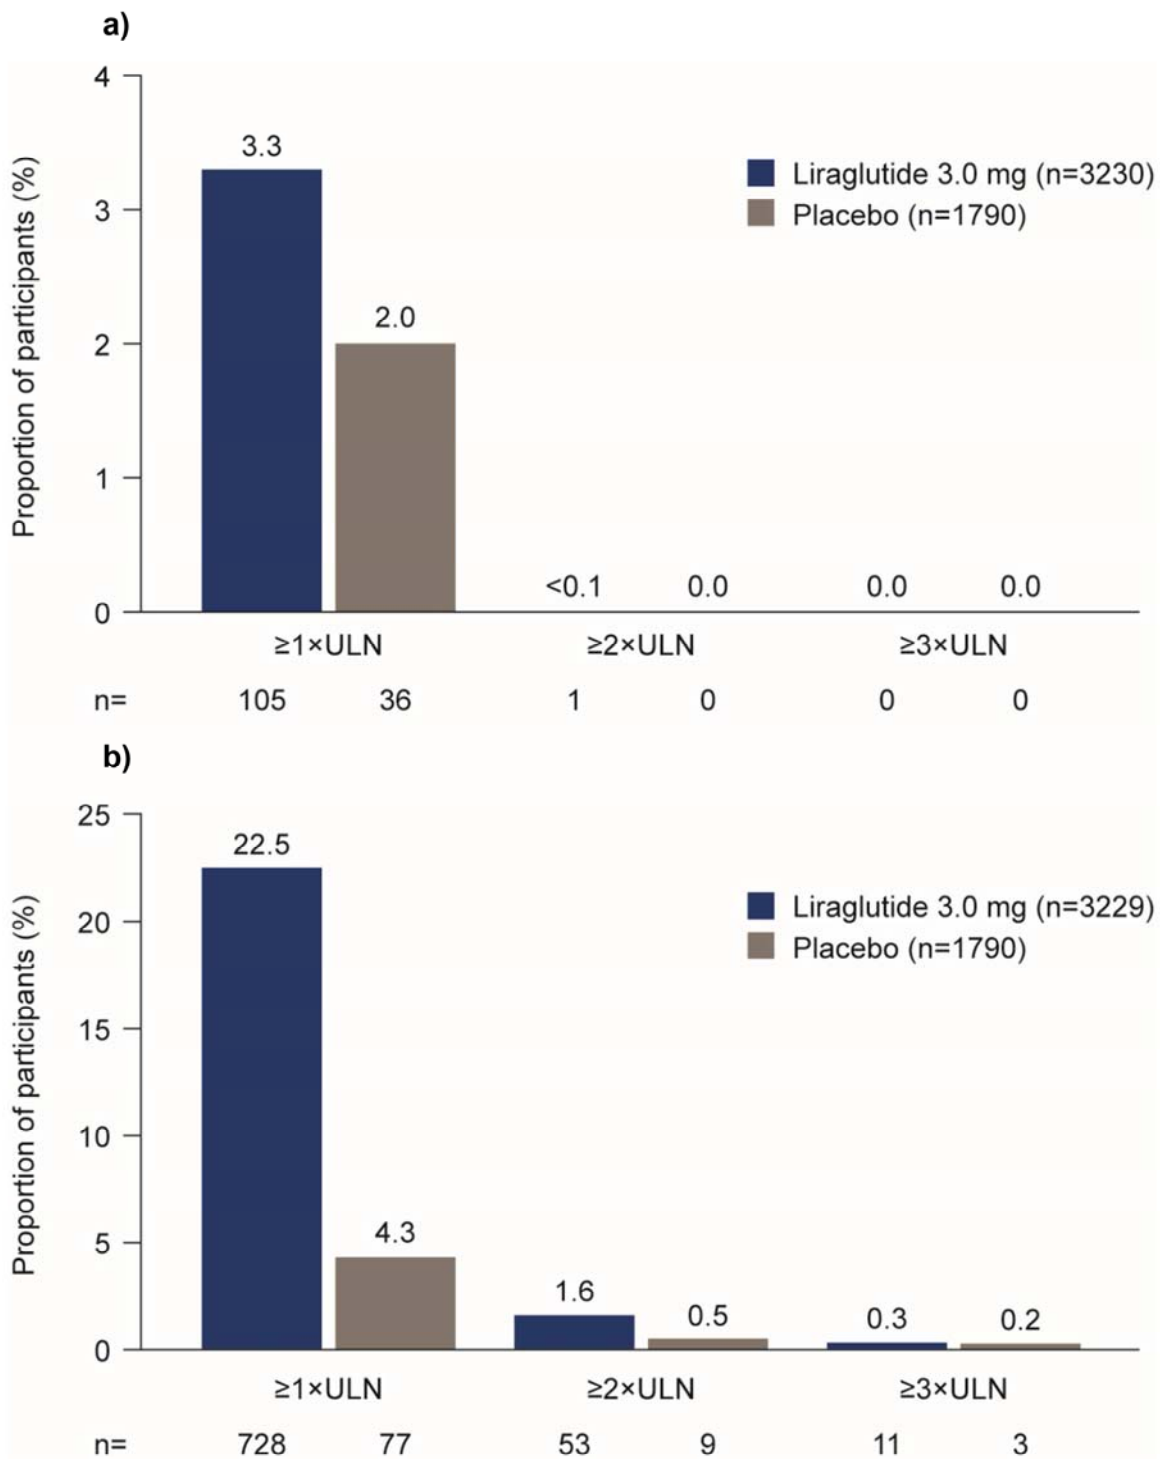

SUPPLEMENTARY DATA

**Supplementary Figure 4.** Overview of the pancreatitis events sent for adjudication.

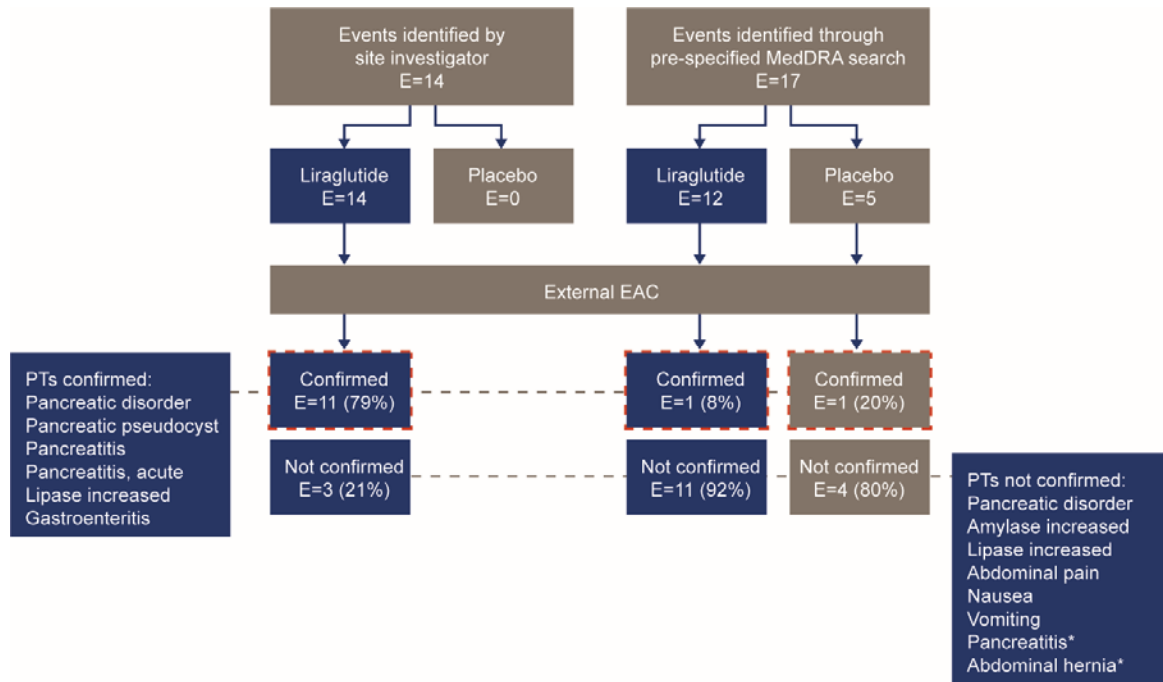

\*Could not be adjudicated due to incomplete source documentation. E, number of pancreatitis events; MedDRA, Medical Dictionary for Regulatory Activities; PT, preferred term (from MedDRA).

SUPPLEMENTARY DATA

**Supplementary Figure 5.** Semi-logarithmic plot of amylase and lipase serum levels for the 13 participants who experienced AP: (a) during liraglutide treatment (n=9); (b) following liraglutide discontinuation (n=3); and (c) with placebo treatment (n=1).

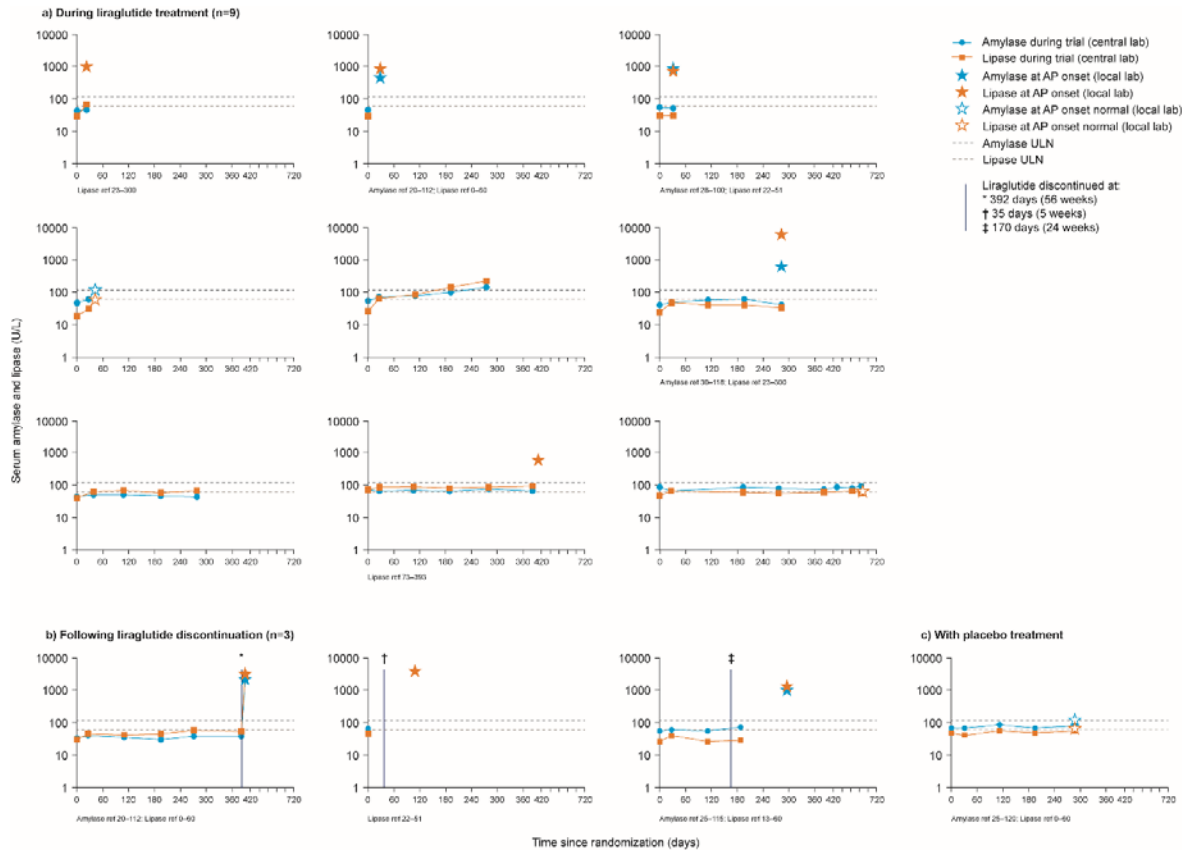

ULN for amylase and lipase: 112U/L and 60U/L (all AP events occurred in Trial 1). Amylase and lipase values plotted on a logarithmic scale. Timescale after 420 days has been compressed. Individual panel footnotes refer to the reference interval for local lab measurements. Amylase level at AP event not reported for patient data in panels 1, 5, 7-9, and 11. Lipase level at AP event not reported for patient data in panels 5 and 7

SUPPLEMENTARY DATA

**Supplementary Table 1.** Relationship between patient characteristics at baseline and baseline amylase/lipase activity

|                                 | Amylase                             |            |                                                | Lipase                              |            |                                                |
|---------------------------------|-------------------------------------|------------|------------------------------------------------|-------------------------------------|------------|------------------------------------------------|
|                                 | Ratio (relative to reference group) | 95% CI     | Two-sided test for no effect ( <i>p</i> value) | Ratio (relative to reference group) | 95% CI     | Two-sided test for no effect ( <i>p</i> value) |
| Age group (years)               |                                     |            |                                                |                                     |            |                                                |
| <45 / ≥65                       | 0.89                                | 0.85; 0.93 |                                                | 0.87                                | 0.83; 0.91 |                                                |
| 45-54 / ≥65                     | 0.92                                | 0.88; 0.97 | <0.0001                                        | 0.94                                | 0.89; 0.98 | <0.0001                                        |
| 55-64 / ≥65                     | 0.95                                | 0.91; 1.00 |                                                | 0.99                                | 0.94; 1.03 |                                                |
| Sex                             |                                     |            |                                                |                                     |            |                                                |
| Female/Male                     | 0.97                                | 0.95; 0.99 | 0.0137                                         | 0.95                                | 0.93; 0.98 | 0.0003                                         |
| Race                            |                                     |            |                                                |                                     |            |                                                |
| Asian/White                     | 1.14                                | 1.08; 1.21 |                                                | 0.90                                | 0.85; 0.95 |                                                |
| Black or African American/White | 1.37                                | 1.33; 1.42 | <0.0001                                        | 0.86                                | 0.83; 0.89 | <0.0001                                        |
| Other/White                     | 1.13                                | 1.05; 1.21 |                                                | 0.90                                | 0.84; 0.97 |                                                |
| BMI (kg/m <sup>2</sup> )        |                                     |            |                                                |                                     |            |                                                |
| <30 / ≥40                       | 1.27                                | 1.20; 1.33 |                                                | 1.20                                | 1.14; 1.26 |                                                |
| 30-34 / ≥40                     | 1.17                                | 1.15; 1.20 | <0.0001                                        | 1.13                                | 1.10; 1.16 | <0.0001                                        |
| 35-39 / ≥40                     | 1.10                                | 1.08; 1.13 |                                                | 1.05                                | 1.03; 1.08 |                                                |
| Dyslipidemia                    |                                     |            |                                                |                                     |            |                                                |
| Yes/no                          | 1.03                                | 1.01; 1.06 | 0.0039                                         | 1.09                                | 1.06; 1.11 | <0.0001                                        |
| Hypertension                    |                                     |            |                                                |                                     |            |                                                |
| Yes/no                          | 1.03                                | 1.01; 1.05 | 0.0063                                         | 1.05                                | 1.03; 1.07 | <0.0001                                        |
| Renal impairment                |                                     |            |                                                |                                     |            |                                                |
| Mild/normal                     | 1.07                                | 1.05; 1.09 |                                                | 1.10                                | 1.07; 1.12 |                                                |
| Moderate/normal                 | 1.20                                | 1.14; 1.26 | <0.0001                                        | 1.29                                | 1.23; 1.36 | <0.0001                                        |
| Severe/normal                   | 1.55                                | 1.12; 2.15 |                                                | 1.24                                | 0.89; 1.74 |                                                |
| Glycemic status                 |                                     |            |                                                |                                     |            |                                                |
| Prediabetes/ normoglycemia      | 0.98                                | 0.96; 1.01 | 0.0721                                         | 1.02                                | 1.00; 1.05 | <0.0001                                        |
| Diabetes/ normoglycemia         | 0.96                                | 0.93; 1.00 |                                                | 1.20                                | 1.15; 1.24 |                                                |

Safety analysis set

SUPPLEMENTARY DATA

**Supplementary Table 2.** Relationship between patient characteristics and change in amylase/lipase activity from baseline associated with liraglutide

|                          |                           | Amylase                                     |            |                                                                                  | Lipase                                      |            |                                                                                  |
|--------------------------|---------------------------|---------------------------------------------|------------|----------------------------------------------------------------------------------|---------------------------------------------|------------|----------------------------------------------------------------------------------|
|                          |                           | Treatment ratio (liraglutide 3.0mg/placebo) | 95% CI     | Two-sided test for no characteristic and treatment interaction ( <i>p</i> value) | Treatment ratio (liraglutide 3.0mg/placebo) | 95% CI     | Two-sided test for no characteristic and treatment interaction ( <i>p</i> value) |
| Age group (years)        | <45                       | 1.05                                        | 1.03; 1.07 | 0.0027                                                                           | 1.26                                        | 1.22; 1.29 | 0.0002                                                                           |
|                          | 45-54                     | 1.08                                        | 1.06; 1.10 |                                                                                  | 1.35                                        | 1.31; 1.40 |                                                                                  |
|                          | 55-64                     | 1.08                                        | 1.06; 1.11 |                                                                                  | 1.31                                        | 1.26; 1.37 |                                                                                  |
|                          | ≥65                       | 1.15                                        | 1.09; 1.20 |                                                                                  | 1.47                                        | 1.36; 1.58 |                                                                                  |
| Sex                      | Female                    | 1.06                                        | 1.05; 1.08 | 0.0363                                                                           | 1.30                                        | 1.27; 1.33 | 0.2226                                                                           |
|                          | Male                      | 1.09                                        | 1.07; 1.12 |                                                                                  | 1.34                                        | 1.29; 1.39 |                                                                                  |
| Race                     | White                     | 1.07                                        | 1.06; 1.08 | 0.6514                                                                           | 1.30                                        | 1.27; 1.33 | 0.2515                                                                           |
|                          | Asian                     | 1.08                                        | 1.01; 1.16 |                                                                                  | 1.37                                        | 1.22; 1.53 |                                                                                  |
|                          | Black or African-American | 1.09                                        | 1.06; 1.13 |                                                                                  | 1.36                                        | 1.28; 1.45 |                                                                                  |
|                          | Other                     | 1.05                                        | 0.97; 1.14 |                                                                                  | 1.42                                        | 1.24; 1.63 |                                                                                  |
| BMI (kg/m <sup>2</sup> ) | <30                       | 1.10                                        | 1.05; 1.16 | 0.6712                                                                           | 1.35                                        | 1.24; 1.47 | 0.7196                                                                           |
|                          | 30-34                     | 1.08                                        | 1.05; 1.10 |                                                                                  | 1.32                                        | 1.28; 1.37 |                                                                                  |
|                          | 35-39                     | 1.07                                        | 1.04; 1.09 |                                                                                  | 1.31                                        | 1.26; 1.35 |                                                                                  |
|                          | ≥40                       | 1.07                                        | 1.05; 1.09 |                                                                                  | 1.29                                        | 1.25; 1.34 |                                                                                  |
| Dyslipidemia             | No                        | 1.07                                        | 1.05; 1.08 | 0.1846                                                                           | 1.31                                        | 1.28; 1.34 | 0.8393                                                                           |
|                          | Yes                       | 1.08                                        | 1.06; 1.11 |                                                                                  | 1.31                                        | 1.27; 1.36 |                                                                                  |
| Hypertension             | No                        | 1.07                                        | 1.06; 1.09 | 0.7800                                                                           | 1.31                                        | 1.28; 1.35 | 0.8189                                                                           |
|                          | Yes                       | 1.08                                        | 1.06; 1.10 |                                                                                  | 1.31                                        | 1.27; 1.35 |                                                                                  |
| Renal impairment         | Normal                    | 1.07                                        | 1.05; 1.09 | 0.8771                                                                           | 1.29                                        | 1.25; 1.32 | 0.1287                                                                           |
|                          | Mild                      | 1.08                                        | 1.06; 1.10 |                                                                                  | 1.34                                        | 1.30; 1.38 |                                                                                  |
|                          | Moderate                  | 1.06                                        | 1.00; 1.13 |                                                                                  | 1.35                                        | 1.22; 1.49 |                                                                                  |
|                          | Severe                    | 0.98                                        | 0.68; 1.42 |                                                                                  | 0.91                                        | 0.50; 1.67 |                                                                                  |
| Glycemic status          | Normoglycemia             | 1.04                                        | 1.02; 1.06 | 0.0045                                                                           | 1.28                                        | 1.24; 1.32 | 0.2248                                                                           |
|                          | Prediabetes               | 1.08                                        | 1.06; 1.10 |                                                                                  | 1.33                                        | 1.29; 1.36 |                                                                                  |
|                          | Diabetes                  | 1.10                                        | 1.06; 1.14 |                                                                                  | 1.29                                        | 1.22; 1.37 |                                                                                  |

Safety analysis set

SUPPLEMENTARY DATA

**Supplementary Table 3.** Positive predictive value of increased amylase levels for EAC confirmed pancreatitis

|                                                              | Liraglutide 3.0 mg (N=3291) |       |
|--------------------------------------------------------------|-----------------------------|-------|
|                                                              | N                           | (%)   |
| Amylase $\geq$ 1 ULN during trial<br>Subsequent pancreatitis | 373<br>1                    | (0.3) |
| Amylase $\geq$ 2 ULN during trial<br>Subsequent pancreatitis | 27<br>0                     | (0.0) |
| Amylase $\geq$ 3 ULN during trial<br>Subsequent pancreatitis | 4<br>0                      | (0.0) |

Safety analysis set; All phase 3 trials; All events of pancreatitis (including treatment-emergent and non-treatment-emergent events); Amylase measurements include unscheduled visits; observed data including the 120-day regulatory safety update period. Upper limit of normal (ULN) for amylase: 100 U/L (Trials 3 and 4) and 112U/L (Trials 1 and 2).



SUPPLEMENTARY DATA

**Supplementary Table 4.** Positive predictive value of increased lipase levels for EAC confirmed pancreatitis

|                                 | Liraglutide 3.0 mg (N=3291) |       |
|---------------------------------|-----------------------------|-------|
|                                 | N                           | (%)   |
| Lipase $\geq$ 1ULN during trial | 1536                        |       |
| Subsequent pancreatitis         | 4                           | (0.3) |
| Lipase $\geq$ 2ULN during trial | 317                         |       |
| Subsequent pancreatitis         | 1                           | (0.3) |
| Lipase $\geq$ 3ULN during trial | 137                         |       |
| Subsequent pancreatitis         | 1                           | (0.7) |

Safety analysis set; All phase 3 trials; All events of pancreatitis (including treatment-emergent and non-treatment-emergent events); Lipase measurements include unscheduled visits; observed data including the 120-day regulatory safety update period. Upper limit of normal (ULN) for lipase: 60U/L.
